# Supplementary material for: Effect of Continuous Positive Airway Pressure on Changes of Plasma/Serum Ghrelin and Evaluation of These Changes between Adults with Obstructive Sleep Apnea and Controls: A Meta-Analysis
Source: MDPI journal article supplement (doi:10.3390/life13010149), 2023-01-04
Supplement: s1 [file s1]

**I. The Joanna Briggs Institute (JBI) Critical Appraisal Checklist for case-control study (last amended in 2017)****Website:** [https://joannabriggs.org/critical\\_appraisal\\_tools](https://joannabriggs.org/critical_appraisal_tools)<https://wiki.joannabriggs.org/display/MANUAL/Appendix+7.2+Critical+appraisal+checklist+for+case-control+studies>

| Major Components                                                                                                 | Response options |    |         |                |
|------------------------------------------------------------------------------------------------------------------|------------------|----|---------|----------------|
| 1. Were the groups comparable other than the presence of disease in cases or the absence of disease in controls? | Yes              | No | Unclear | Not applicable |
| 2. Were cases and controls matched appropriately?                                                                | Yes              | No | Unclear | Not applicable |
| 3. Were the same criteria used for identification of cases and controls?                                         | Yes              | No | Unclear | Not applicable |
| 4. Was exposure measured in a standard, valid and reliable way?                                                  | Yes              | No | Unclear | Not applicable |
| 5. Was exposure measured in the same way for cases and controls?                                                 | Yes              | No | Unclear | Not applicable |
| 6. Were confounding factors identified?                                                                          | Yes              | No | Unclear | Not applicable |
| 7. Were strategies to deal with confounding factors stated?                                                      | Yes              | No | Unclear | Not applicable |
| 8. Were outcomes assessed in a standard, valid and reliable way for cases and controls?                          | Yes              | No | Unclear | Not applicable |
| 9. Was the exposure period of interest long enough to be meaningful?                                             | Yes              | No | Unclear | Not applicable |
| 10. Was appropriate statistical analysis used?                                                                   | Yes              | No | Unclear | Not applicable |

| <b>Q. The National Institutes of Health (NIH) quality assessment tool for before-after (Pre-Post) study with no control group</b>                                                                                           |                  |    |                                                |
|-----------------------------------------------------------------------------------------------------------------------------------------------------------------------------------------------------------------------------|------------------|----|------------------------------------------------|
| <b>Website:</b> <a href="https://www.nhlbi.nih.gov/health-topics/study-quality-assessment-tools">https://www.nhlbi.nih.gov/health-topics/study-quality-assessment-tools</a>                                                 |                  |    |                                                |
| Major Components                                                                                                                                                                                                            | Response options |    |                                                |
| 1. Was the study question or objective clearly stated?                                                                                                                                                                      | Yes              | No | Cannot Determine/ Not Applicable/ Not Reported |
| 2. Were eligibility/selection criteria for the study population prespecified and clearly described?                                                                                                                         | Yes              | No | Cannot Determine/ Not Applicable/ Not Reported |
| 3. Were the participants in the study representative of those who would be eligible for the test/service/intervention in the general or clinical population of interest?                                                    | Yes              | No | Cannot Determine/ Not Applicable/ Not Reported |
| 4. Were all eligible participants that met the prespecified entry criteria enrolled?                                                                                                                                        | Yes              | No | Cannot Determine/ Not Applicable/ Not Reported |
| 5. Was the sample size sufficiently large to provide confidence in the findings?                                                                                                                                            | Yes              | No | Cannot Determine/ Not Applicable/ Not Reported |
| 6. Was the test/service/intervention clearly described and delivered consistently across the study population?                                                                                                              | Yes              | No | Cannot Determine/ Not Applicable/ Not Reported |
| 7. Were the outcome measures prespecified, clearly defined, valid, reliable, and assessed consistently across all study participants?                                                                                       | Yes              | No | Cannot Determine/ Not Applicable/ Not Reported |
| 8. Were the people assessing the outcomes blinded to the participants' exposures/interventions?                                                                                                                             | Yes              | No | Cannot Determine/ Not Applicable/ Not Reported |
| 9. Was the loss to follow-up after baseline 20% or less? Were those lost to follow-up accounted for in the analysis?                                                                                                        | Yes              | No | Cannot Determine/ Not Applicable/ Not Reported |
| 10. Did the statistical methods examine changes in outcome measures from before to after the intervention? Were statistical tests done that provided p values for the pre-to-post changes?                                  | Yes              | No | Cannot Determine/ Not Applicable/ Not Reported |
| 11. Were outcome measures of interest taken multiple times before the intervention and multiple times after the intervention (i.e., did they use an interrupted time-series design)?                                        | Yes              | No | Cannot Determine/ Not Applicable/ Not Reported |
| 12. If the intervention was conducted at a group level (e.g., a whole hospital, a community, etc.) did the statistical analysis take into account the use of individual-level data to determine effects at the group level? | Yes              | No | Cannot Determine/ Not Applicable/ Not Reported |
